# Supplementary material for: “Alterations in the Skin Microbiota Are Associated With Symptom Severity in Mycosis Fungoides”
Source: PubMed Central journal article supplement (PMC9152451; doi:10.3389/fcimb.2022.850509), 2022-05-17

Figure S1

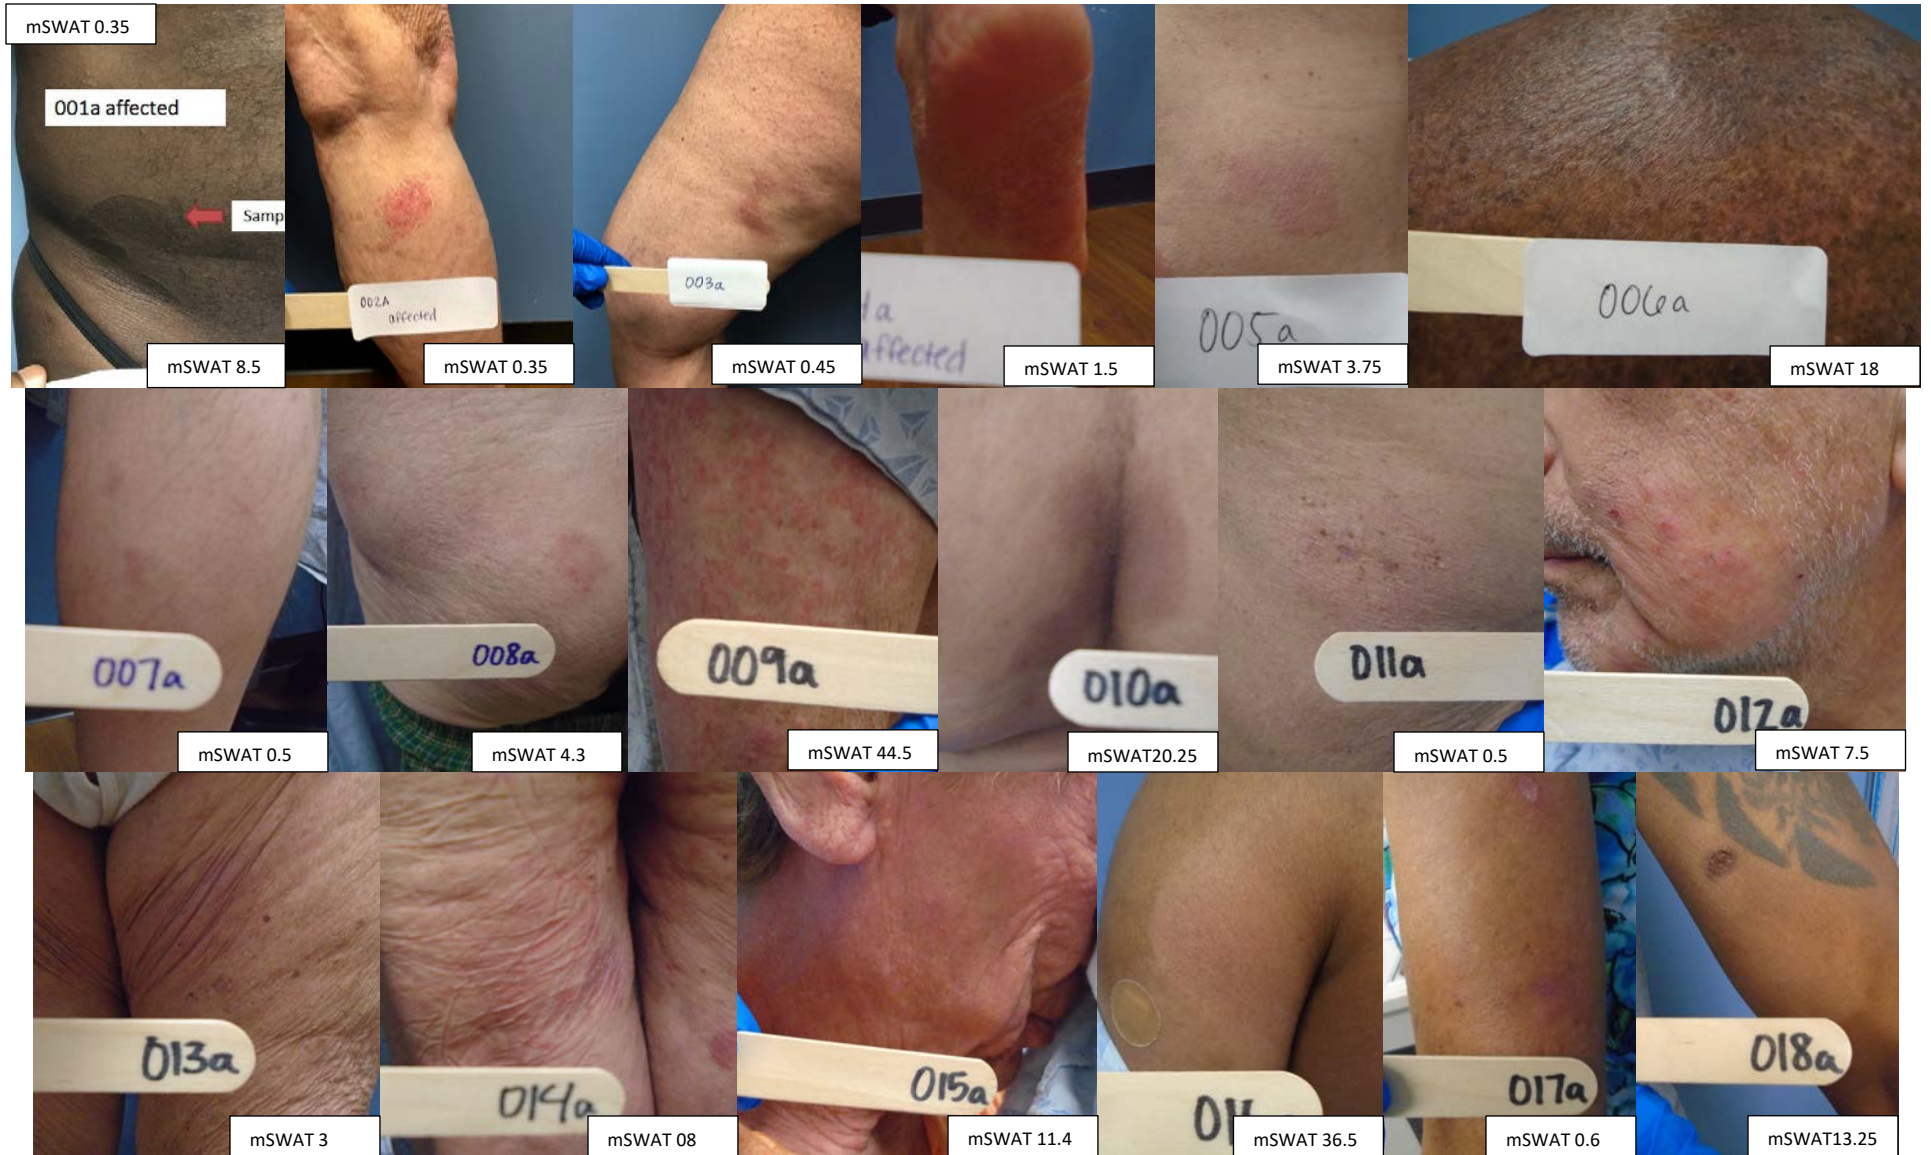

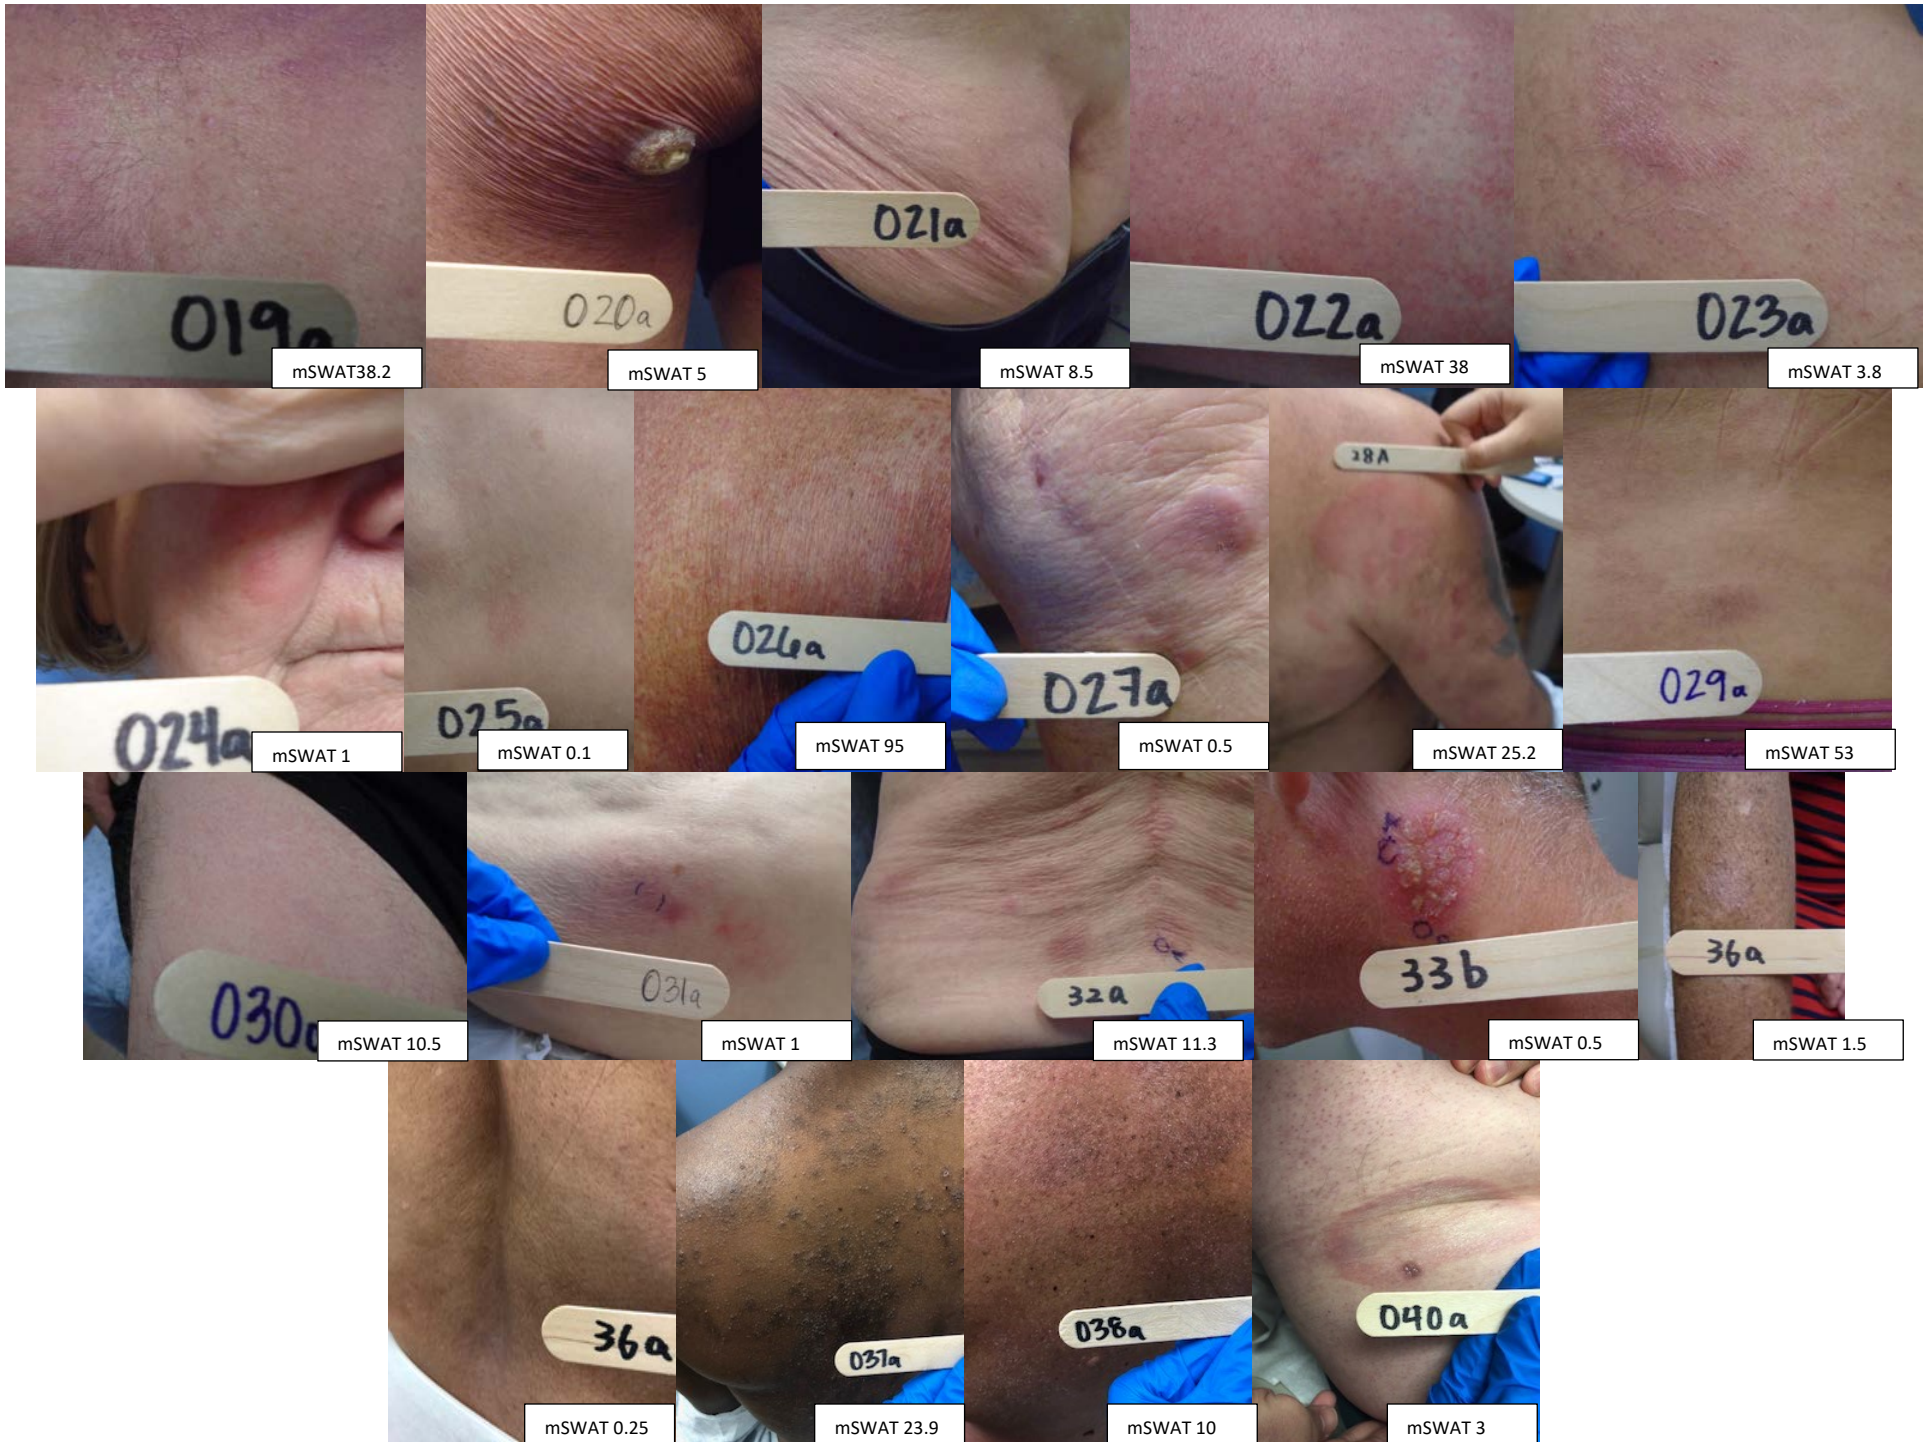

Supplement: DataSheet_1.pdf [file DataSheet_1.pdf]
